# Supplementary material for: Mutational Signatures Driven by Epigenetic Determinants Enable the Stratification of Patients with Gastric Cancer for Therapeutic Intervention
Source: MDPI journal article supplement (doi:10.3390/cancers13030490), 2021-01-27
Supplement: s1 [file s1]

Figure S1: **Heatmap clustering of gastric cancer sample signature exposure.** Mutational signatures called by signeR are arranged in rows, and samples are arranged in columns.

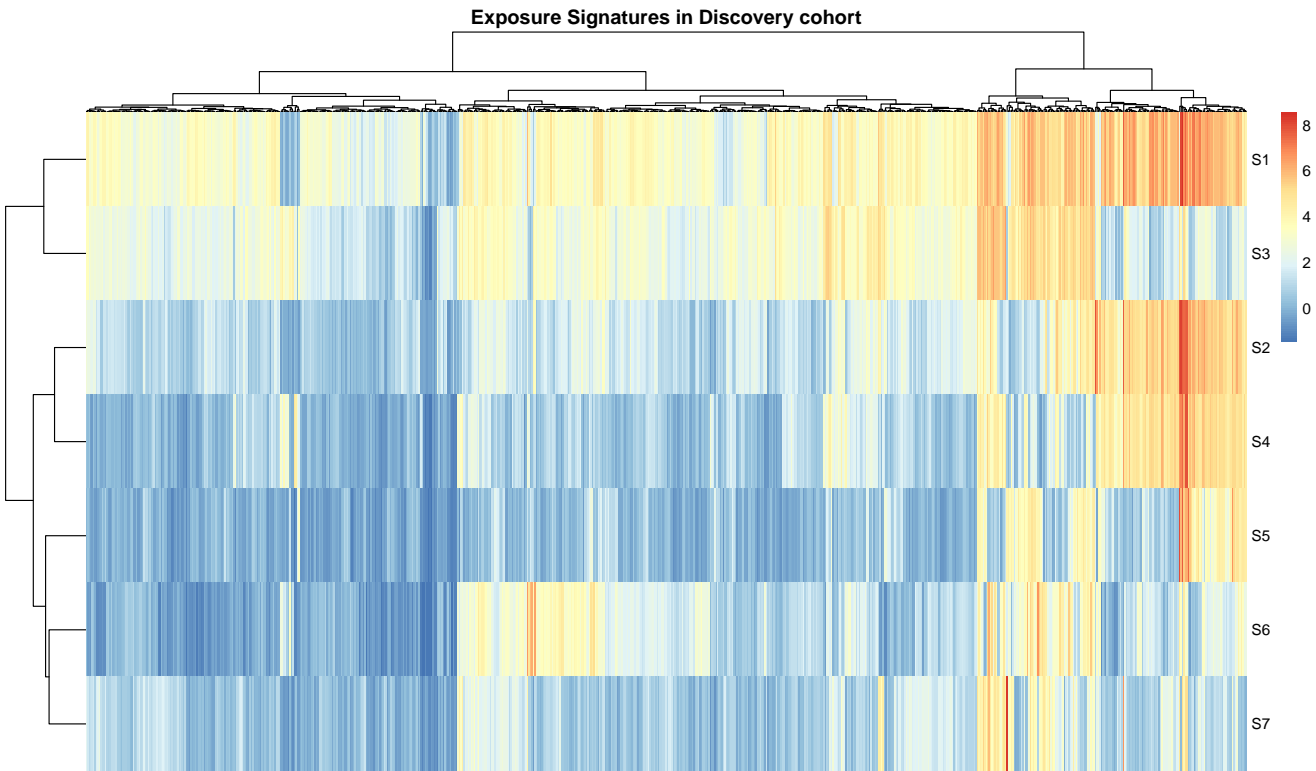

Figure S2: Forest plot of the hazard ratios for overall survival from univariate Cox model analysis. TMB, tumor mutational burden; MSI, microsatellite instability.

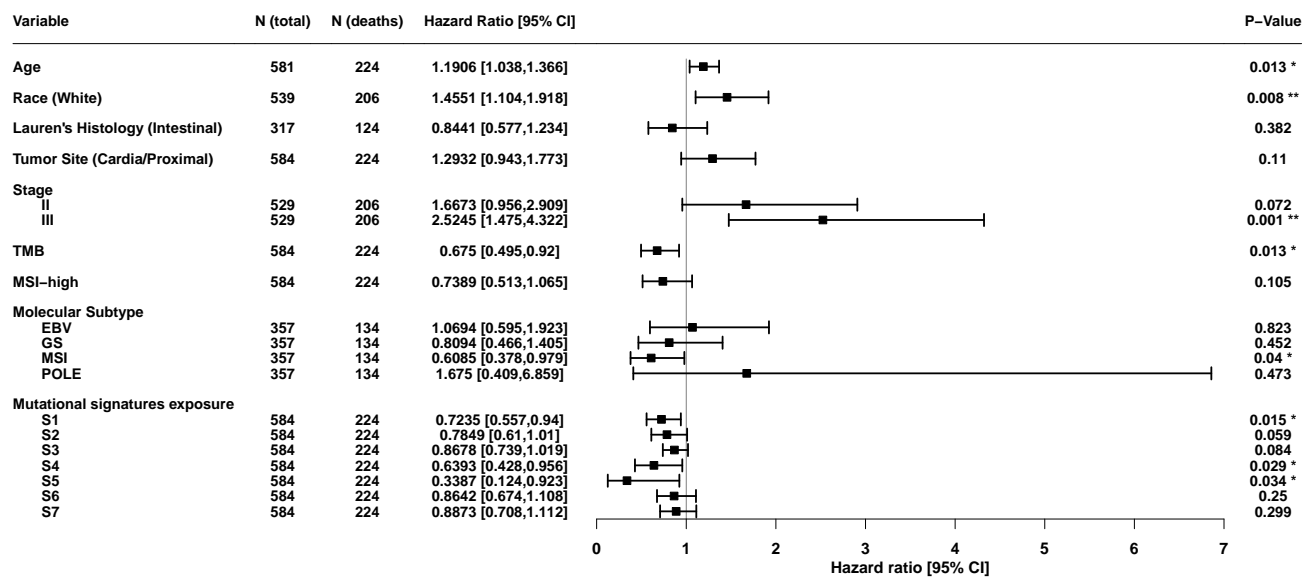

Figure S3: Forest plot of hazard ratios for overall survival from the multivariate Cox model for (a) mutational signature (S) 2 and (b) S5.

(a) Signature S2

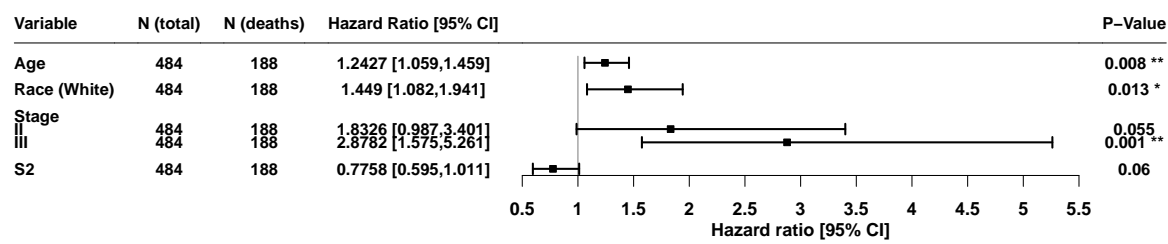

(b) Signature S5

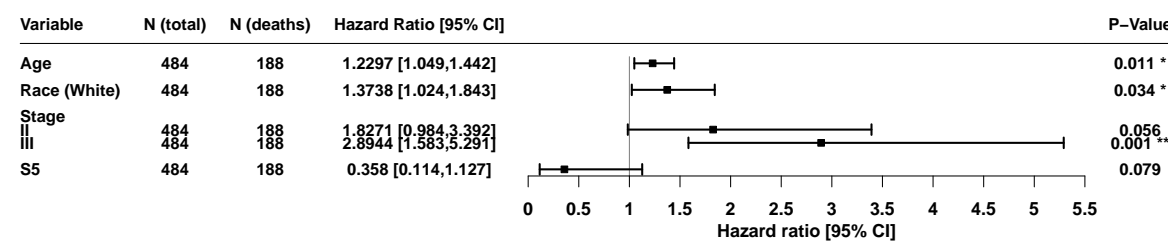

Figure S4: Calibrated plots of 2-year survival (multiple Cox regression models) for (a) mutational signature (S)2, (b) S4, (c) S5, (d) high microsatellite instability, and (e) tumor mutational burden.

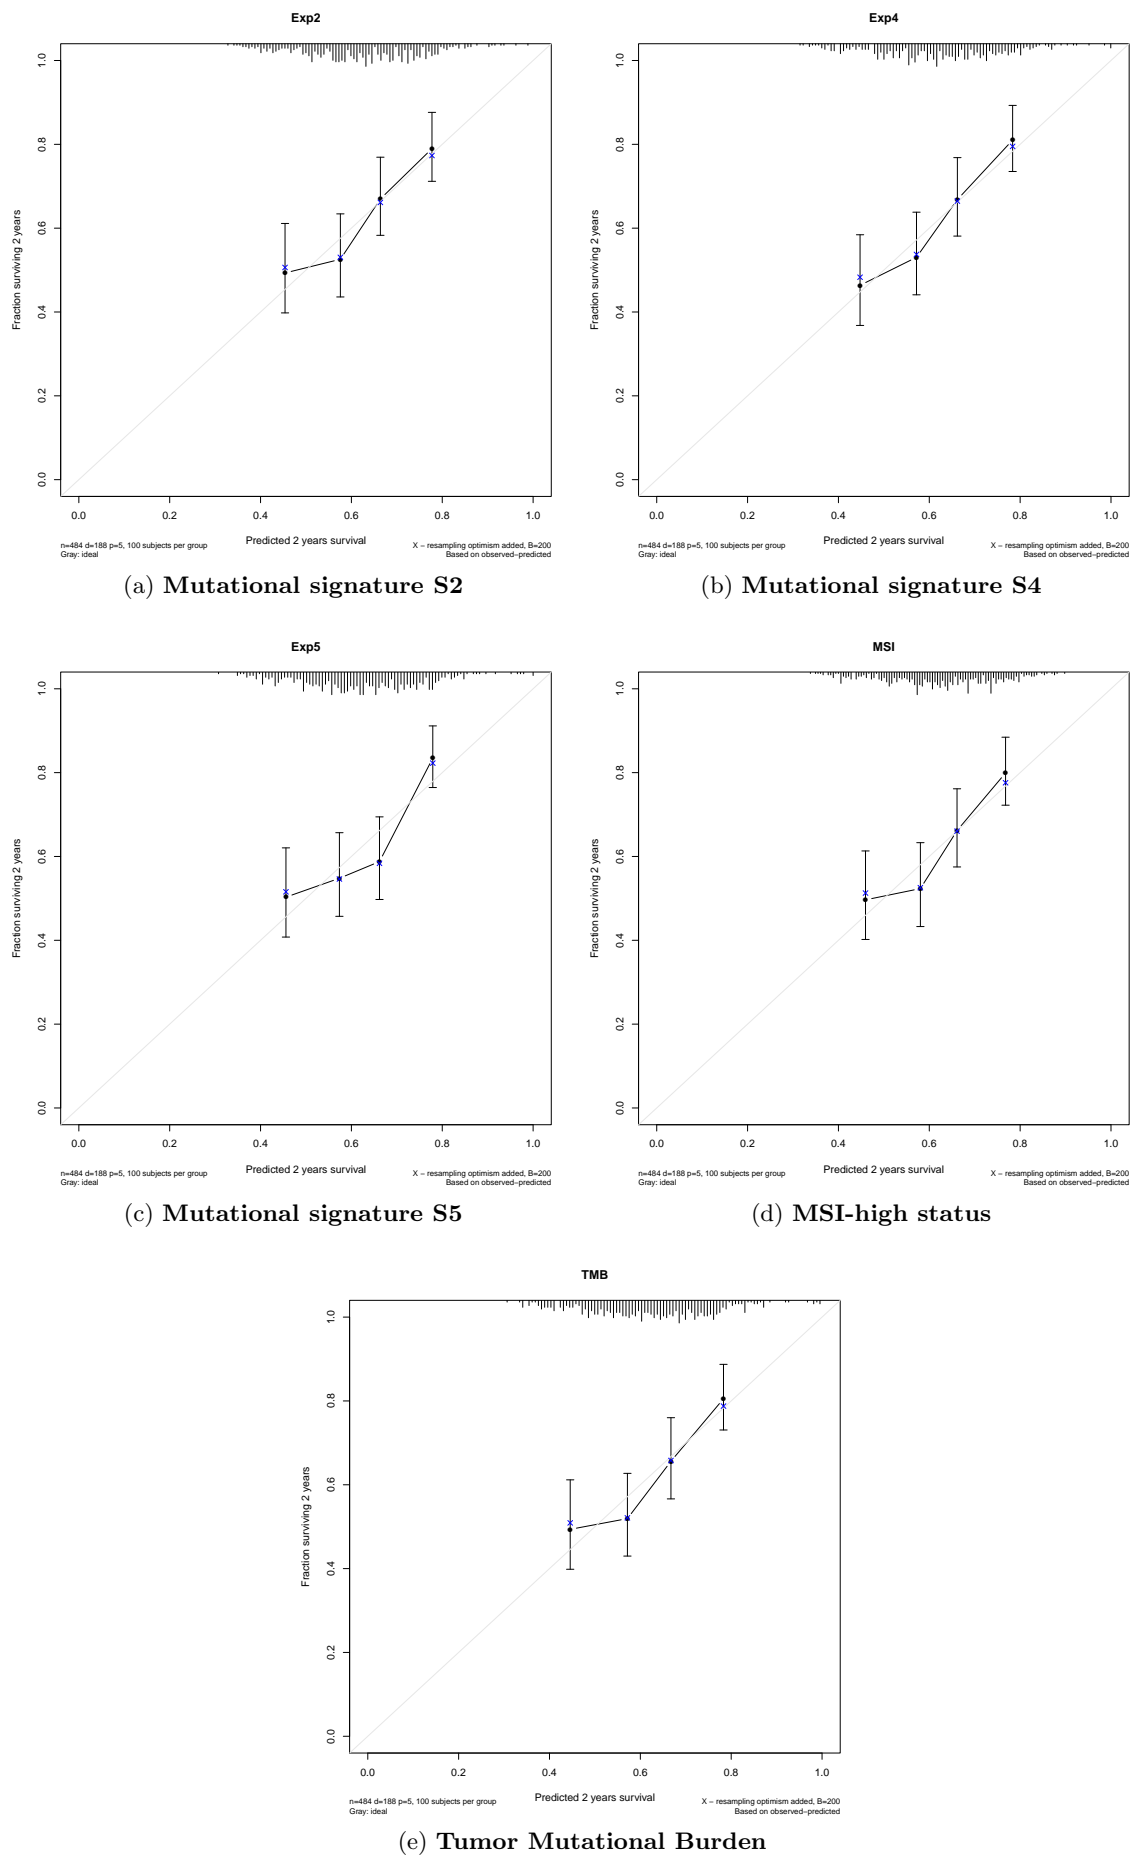

Figure S5: Five-year overall survival for  $S4^{high}$  and  $S4^{low}$  groups in the public cohort.

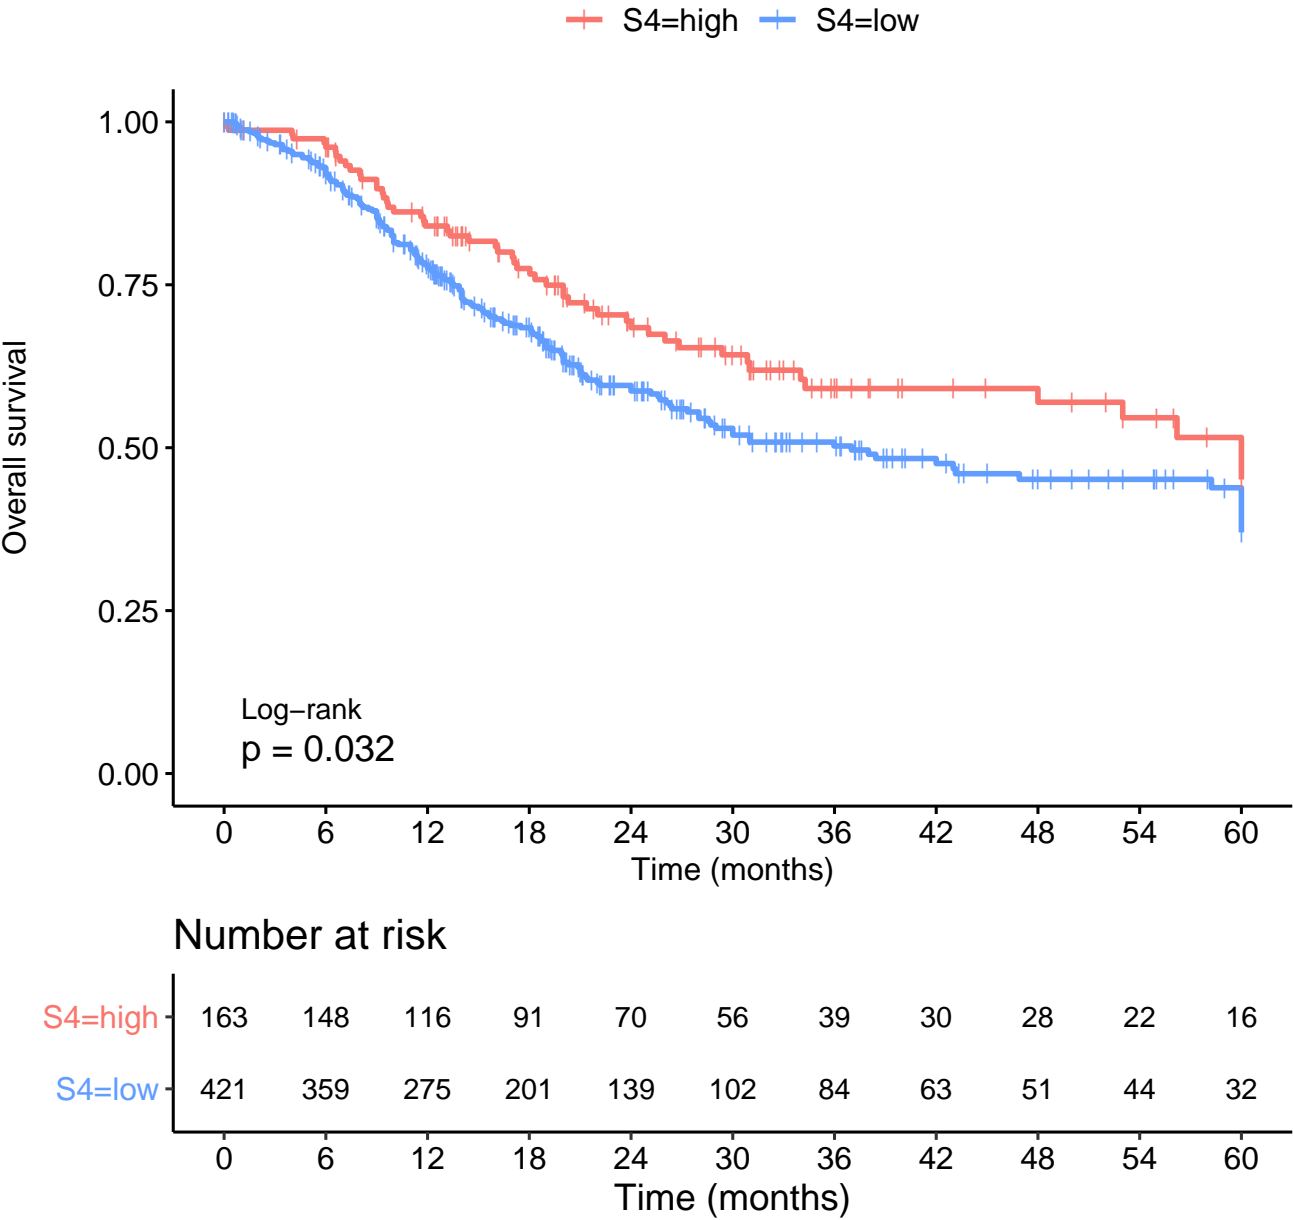

Figure S6: Five-year overall survival for  $S4^{high}$  and  $S4^{low}$  groups in the validation cohort.

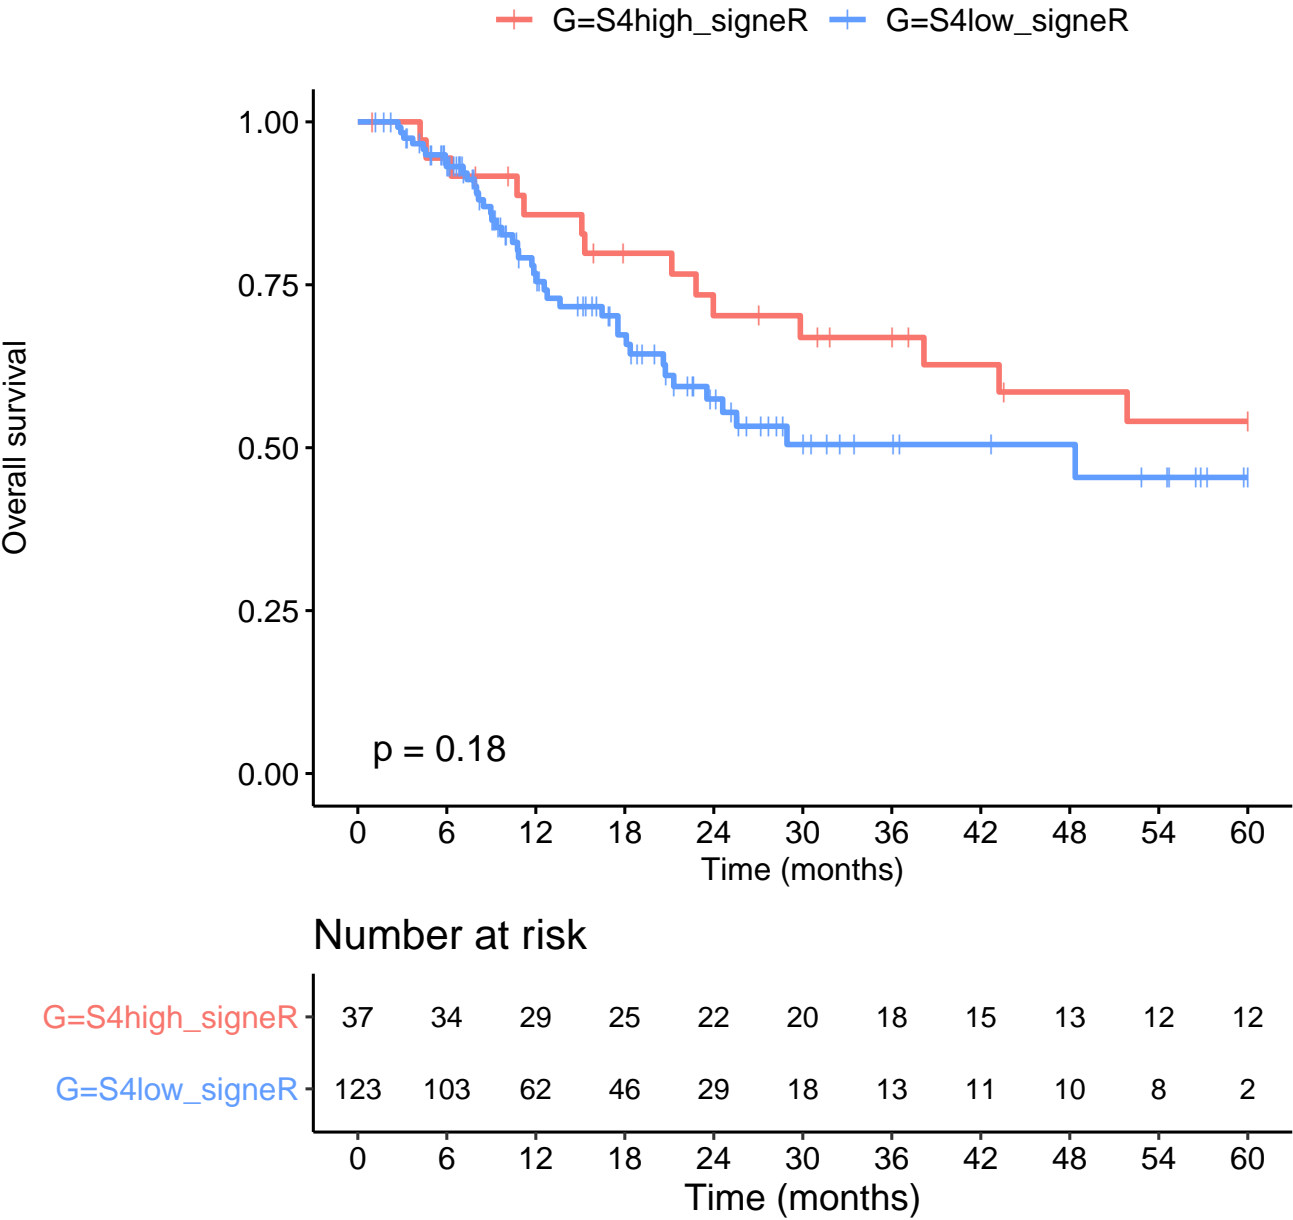

Figure S7: Scatter plots of Spearman's correlation between MMR gene expression levels - FPKM (log-scaled) and methylation loads. Gene expression levels were plotted against average  $\beta$  values for the promoter-related CpG islands of MMR genes.

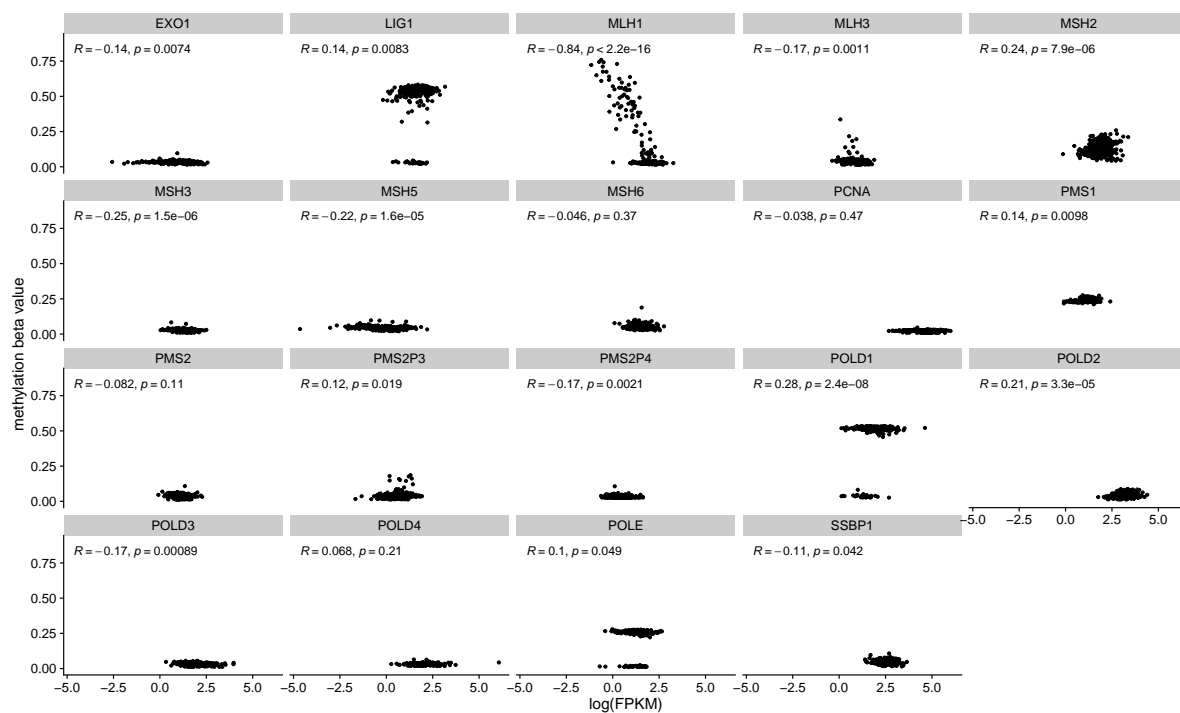

Figure S8: Barplot showing the burdens of previously identified mutational signatures previously identified in the public gastric cancer cohort; isogenic wild-type cells are compared with two subclones with mutations in the *MLH1* gene induced by CRISP-Cas9 assay.

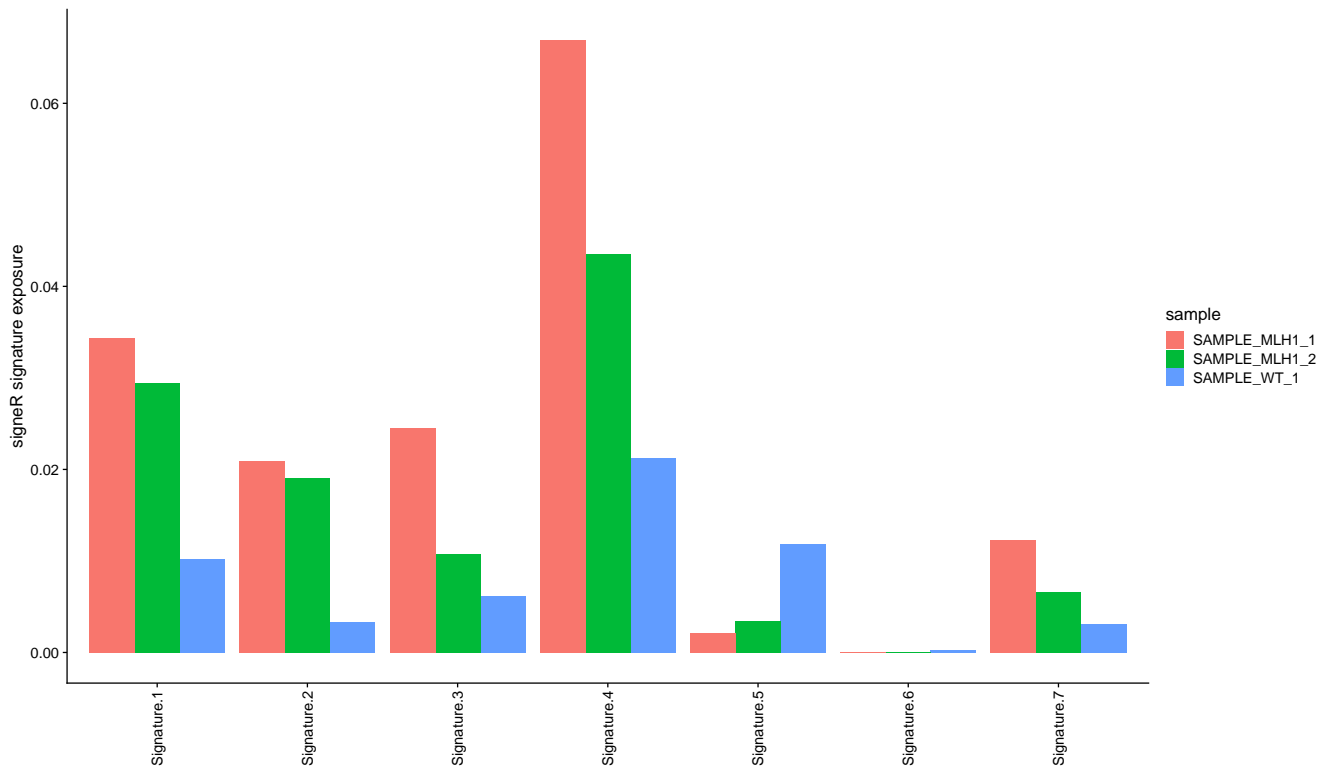



Figure S9: Boxplots of immune and stroma cells scores, estimated by xCell [?], in the mutational signature ( $S4^{high}$  and  $S4^{low}$  groups. \* $p < 0.05$ , \*\* $p < 0.01$ ,  $t$  test.

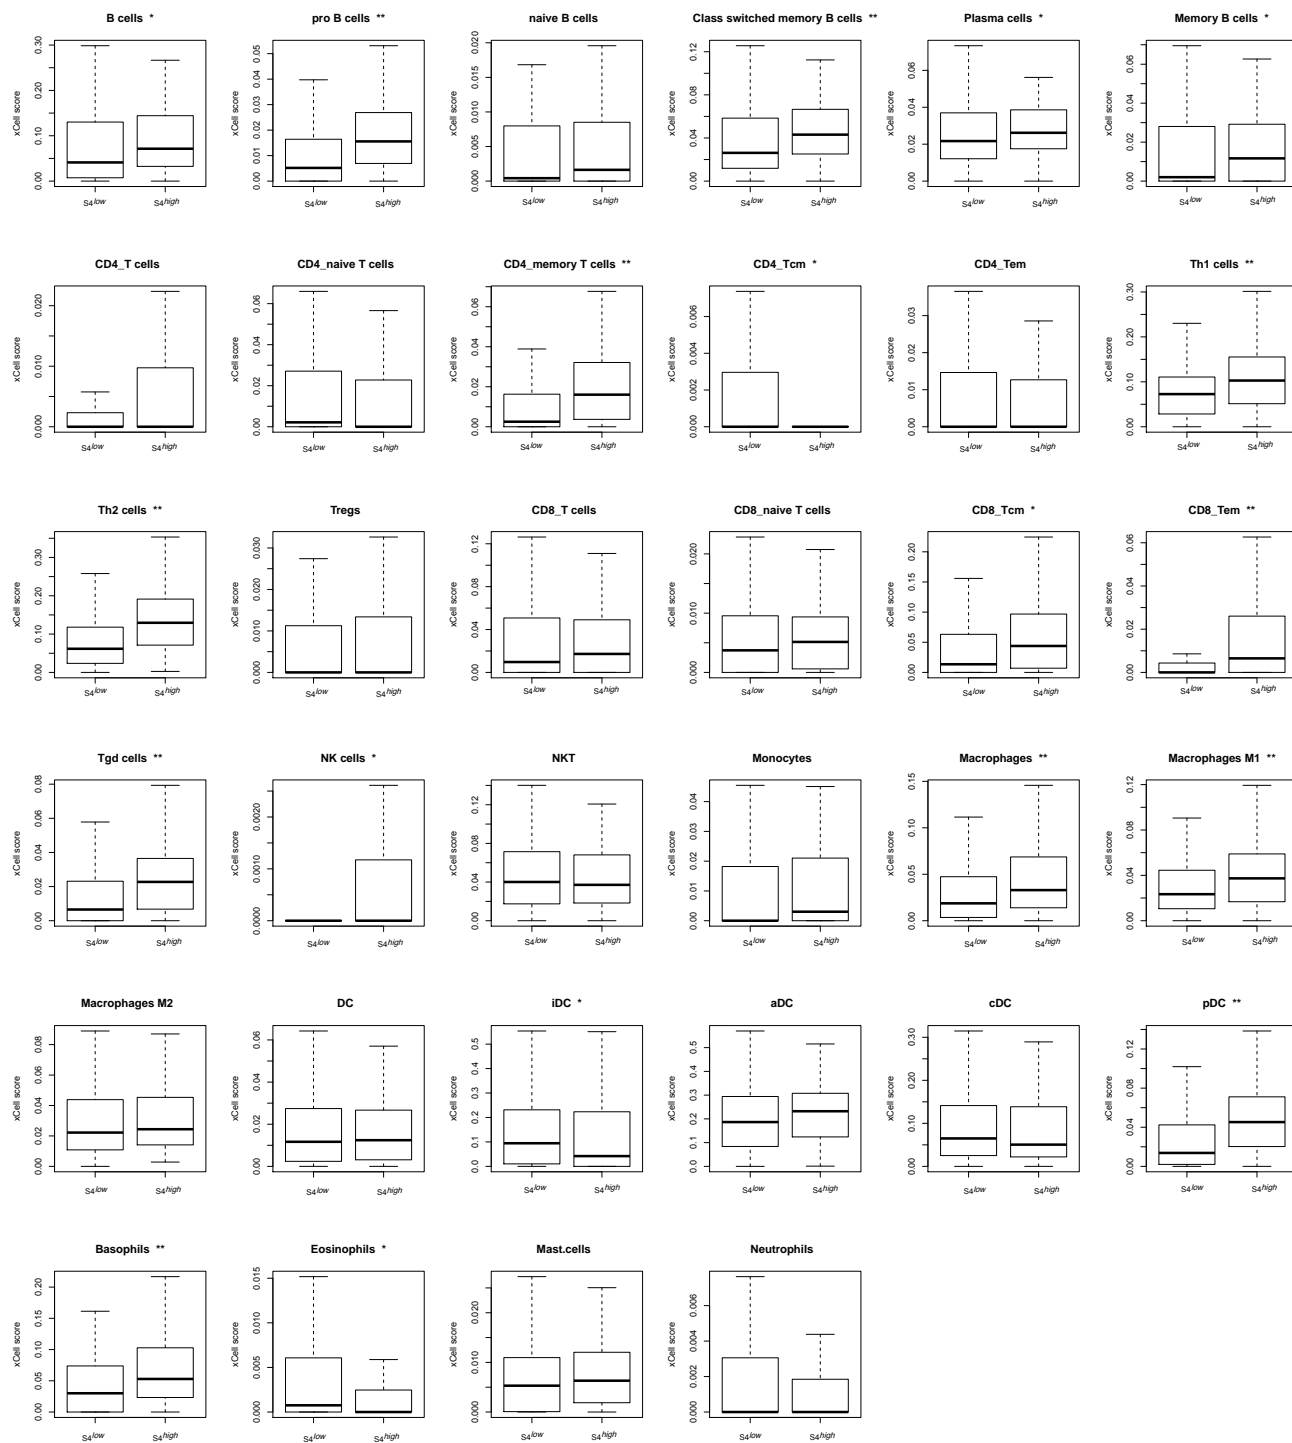

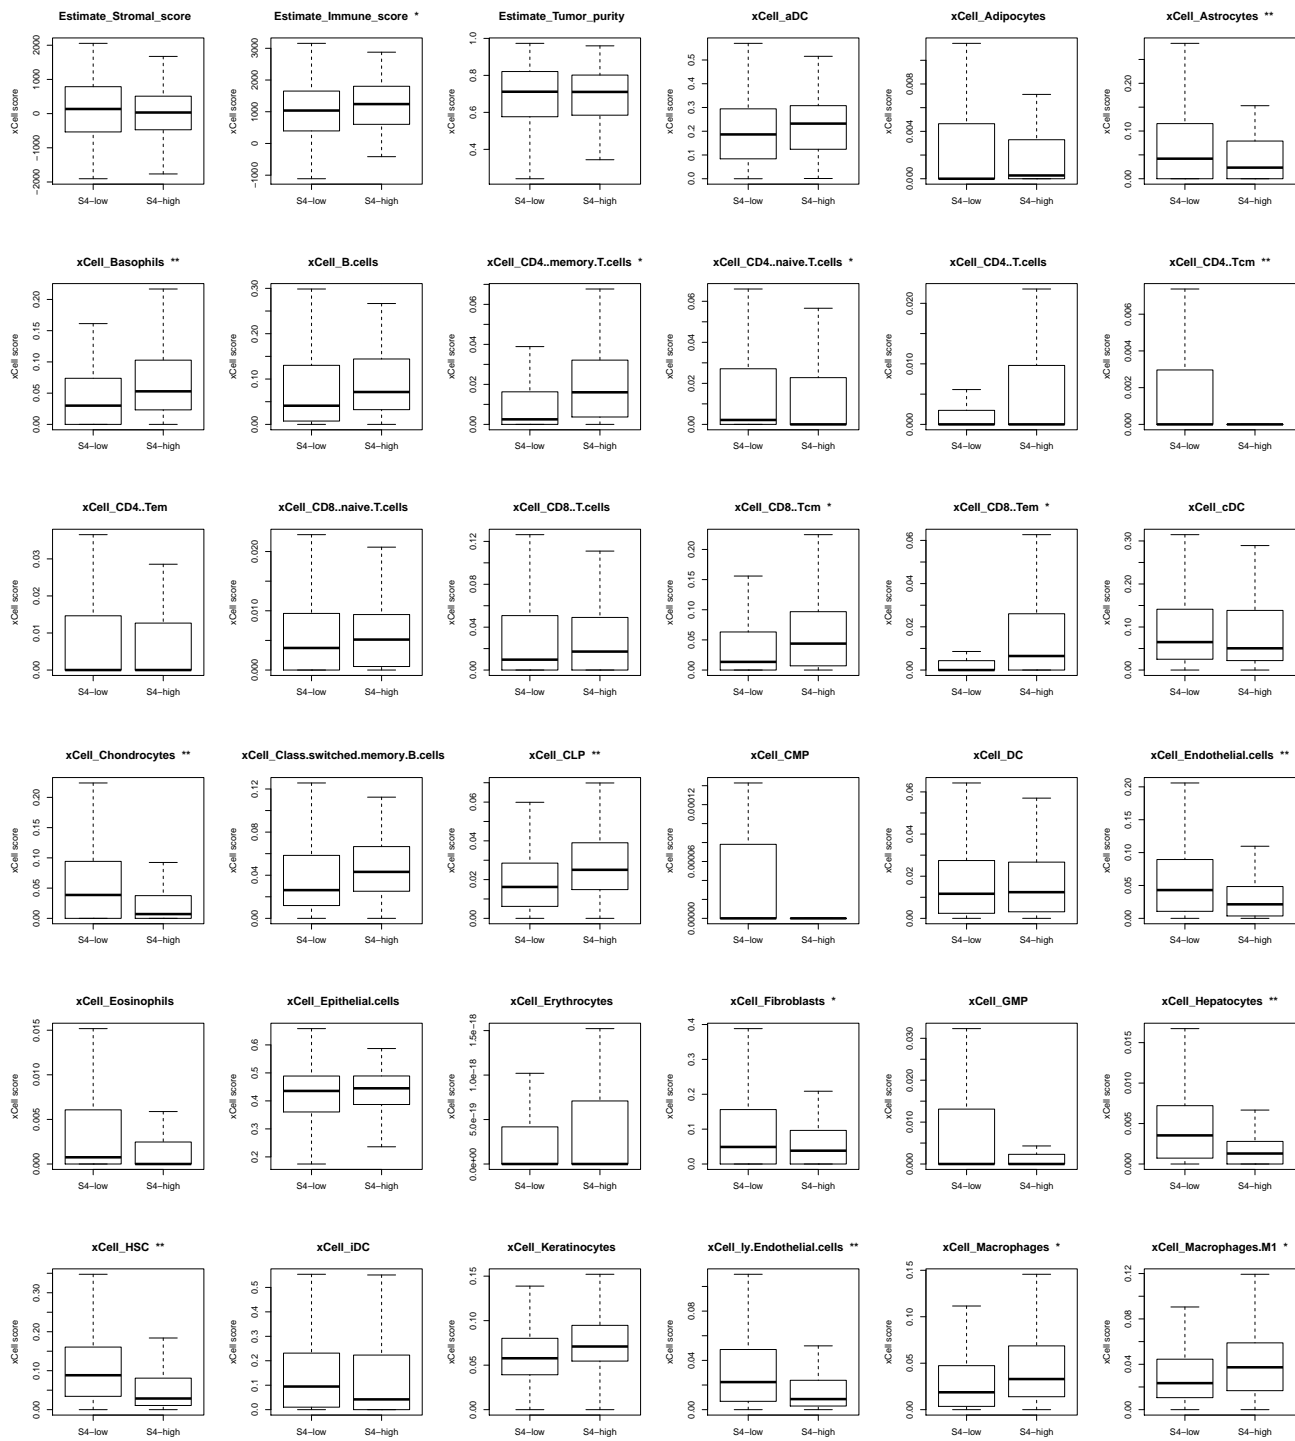

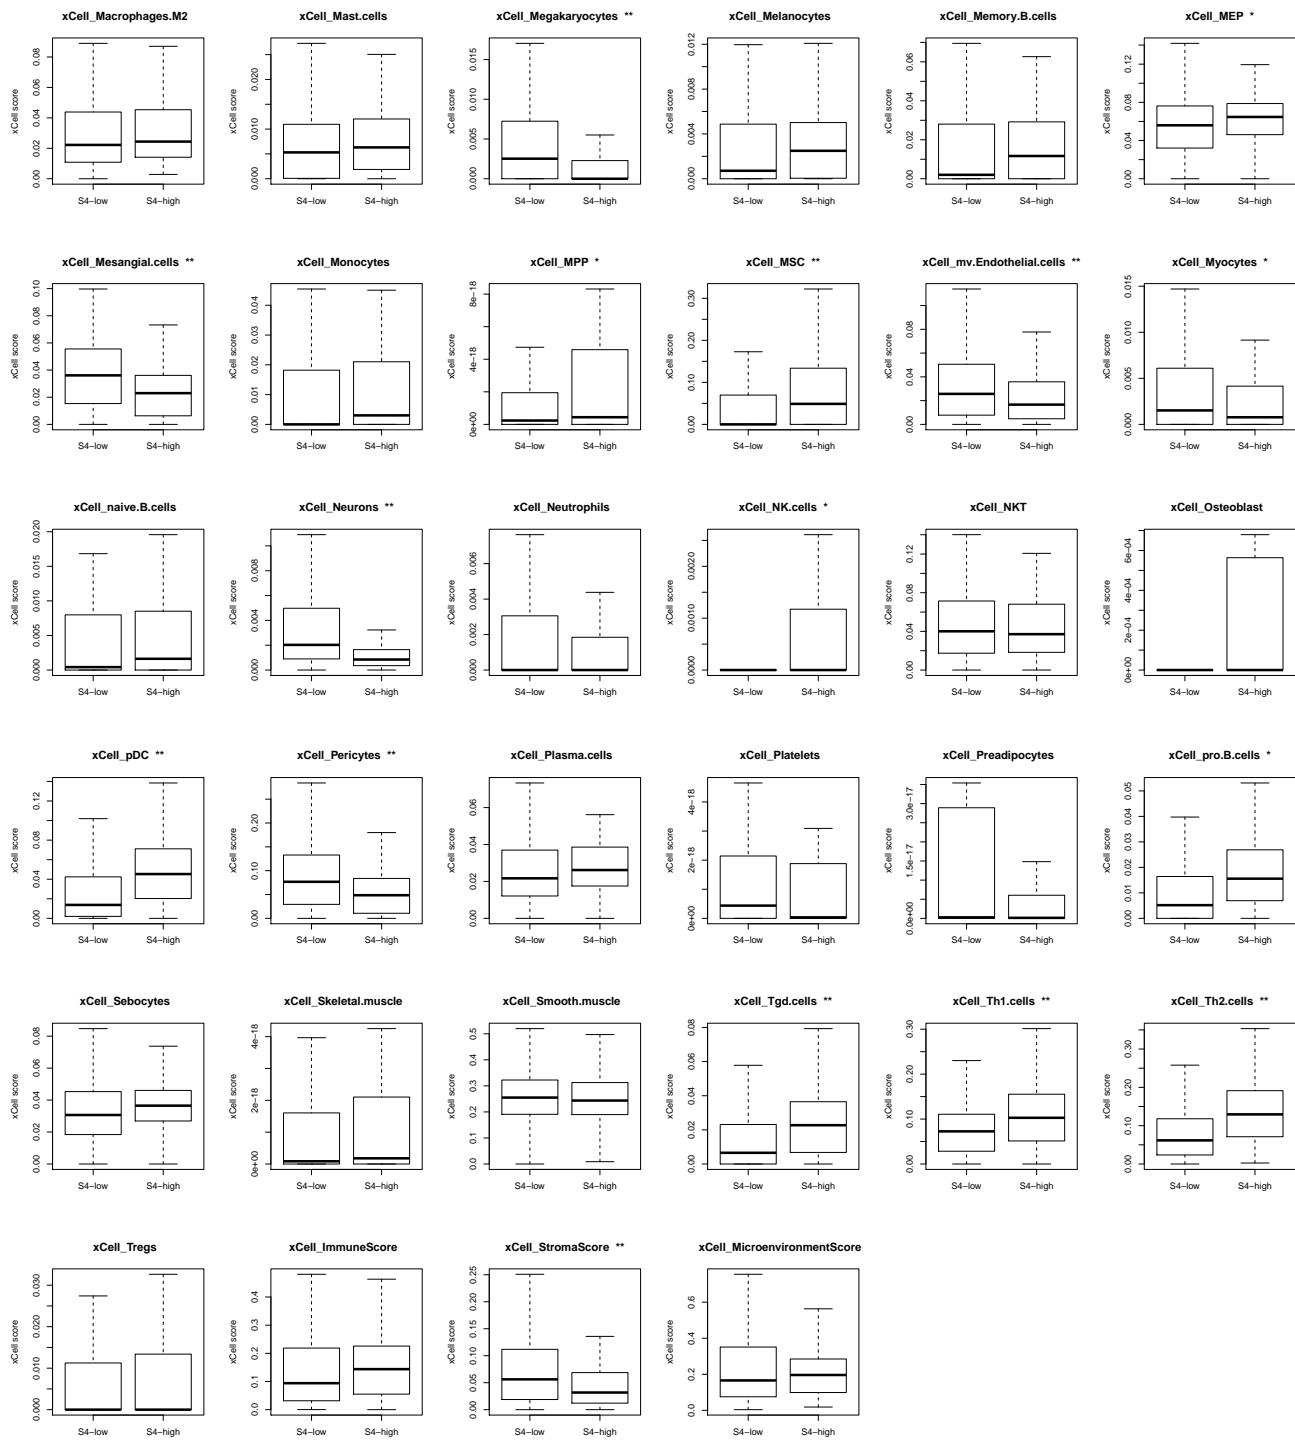

Figure S10: **Boxplots showing the normalized gene expression of immune-related genes.** Immune gene markers as (a) inflammatory/cytotoxic, (b) suppressor/exhausted, (c) costimulatory/antigen presentation, and (d) other natural killer cell receptors and monocyte/macrophage markers. Outlying values were removed.\* $p < 0.05$ , \*\* $p < 0.01$ , \*\*\* $p < 0.001$ , \*\*\*\* $p < 0.0001$ , Mann-Whitney  $U$  test.

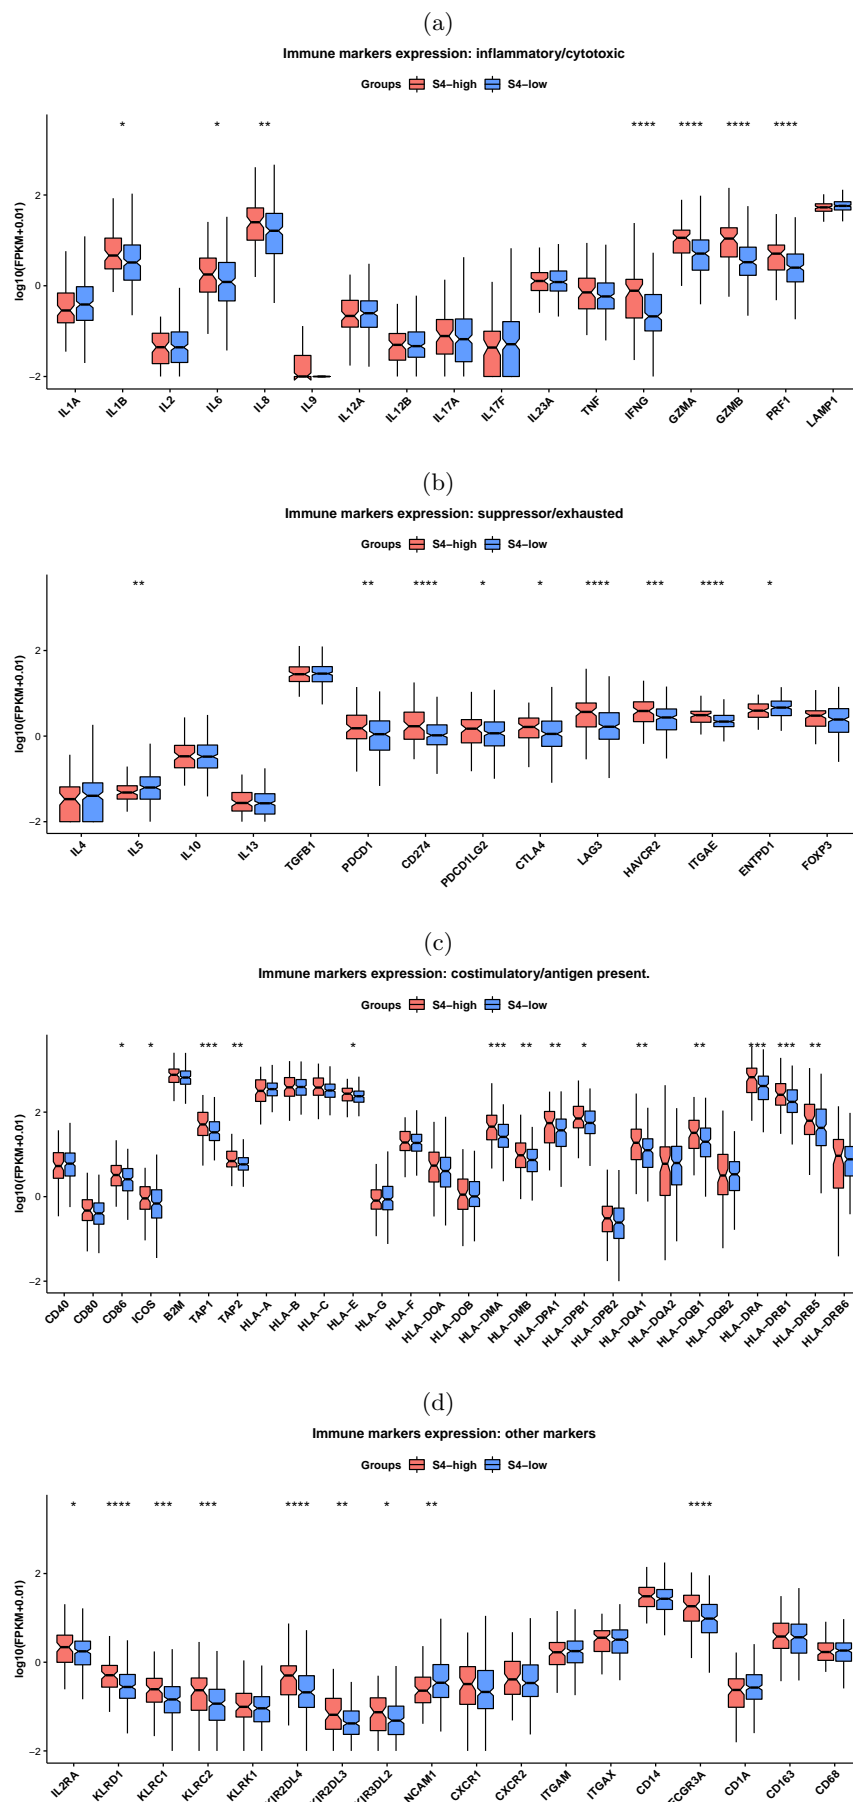

Table S1: Metadata on sample clinical, molecular and immune features.

TableS1\_Clinical-Molecular-features.xlsx.

Table S2: **Significantly mutated genes in the mutational signature (S)4<sup>high</sup> and S4<sup>low</sup> groups and associated pathways.** (a) Significantly mutated genes, related pathways and frequency in the S4<sup>high</sup> group. (b) Description of pathways found for the S4<sup>high</sup> gene set. (c) Significantly mutated genes, related pathways and frequency in the S4<sup>low</sup> group. (d) Description of pathways found for the S4<sup>low</sup> gene set.

TableS2\_SignificantlyMutatedGenes-Pathways.xlsx.

Table S3: Clinicopathological features of gastric cancer samples by cohort.

|                           | TCGA( <i>n</i> = 439) |      | cBioPortal( <i>n</i> = 226) |     | ICGC( <i>n</i> = 122) |     |
|---------------------------|-----------------------|------|-----------------------------|-----|-----------------------|-----|
|                           | <i>N</i>              | %    | <i>N</i>                    | %   | <i>N</i>              | %   |
| <b>Age (mean ± SD)</b>    | 65.75 ± 10.69         |      | 63.1 ± 13.73                |     | 60.30 ± 10.74         |     |
| <b>Gender</b>             | 439                   | 100  | 206                         | 91  | 122                   | 100 |
| Female                    | 158                   | 36   | 79                          | 38  | 37                    | 30  |
| Male                      | 281                   | 64   | 127                         | 62  | 85                    | 70  |
| <b>Race</b>               | 378                   | 86   | 226                         | 100 | 122                   | 100 |
| White                     | 275                   | 73   | 0                           | 0   | 0                     | 0   |
| Black                     | 13                    | 3    | 0                           | 0   | 0                     | 0   |
| Asian                     | 89                    | 24   | 226                         | 100 | 122                   | 100 |
| Other                     | 1                     | 0.26 | 0                           | 0   | 0                     | 0   |
| <b>Anatomic Site</b>      | 422                   | 96   | 205                         | 91  | 0                     | 0   |
| Cardia/Proximal           | 107                   | 25   | 61                          | 30  | 0                     | 0   |
| Fundus/Body               | 151                   | 36   | 61                          | 30  | 0                     | 0   |
| Antrum/Distal             | 159                   | 38   | 83                          | 40  | 0                     | 0   |
| Other                     | 5                     | 1    | 0                           | 0   | 0                     | 0   |
| <b>Histology Lauren</b>   | 261                   | 59   | 206                         | 91  | 0                     | 0   |
| Diffuse                   | 73                    | 28   | 77                          | 37  | 0                     | 0   |
| Intestinal                | 188                   | 72   | 113                         | 55  | 0                     | 0   |
| Mixed                     | 0                     | 0    | 16                          | 8   | 0                     | 0   |
| <b>Stage T</b>            | 430                   | 98   | 156                         | 69  | 117                   | 96  |
| T1 – T2                   | 115                   | 27   | 42                          | 27  | 24                    | 20  |
| T3 – T4                   | 315                   | 73   | 114                         | 73  | 93                    | 80  |
| <b>Stage N</b>            | 421                   | 96   | 156                         | 69  | 117                   | 96  |
| N0                        | 131                   | 31   | 20                          | 13  | 22                    | 19  |
| N+                        | 290                   | 69   | 136                         | 87  | 95                    | 81  |
| <b>Stage M</b>            | 439                   | 100  | 156                         | 69  | 112                   | 92  |
| M0                        | 387                   | 88   | 133                         | 85  | 103                   | 92  |
| M1                        | 30                    | 7    | 23                          | 15  | 9                     | 8   |
| MX                        | 22                    | 5    | 0                           | 0   | 0                     | 0   |
| <b>Pathological Stage</b> | 413                   | 94   | 205                         | 90  | 97                    | 79  |
| I                         | 61                    | 15   | 15                          | 7   | 97                    | 79  |
| II                        | 165                   | 40   | 38                          | 18  | 17                    | 17  |
| III                       | 157                   | 38   | 72                          | 35  | 60                    | 62  |
| IV                        | 30                    | 7    | 80                          | 39  | 11                    | 11  |
| <b>Molecular Subtype</b>  | 383                   | 87   | 20                          | 9   | 0                     | 0   |
| CIN                       | 223                   | 58   | 0                           | 0   | 0                     | 0   |
| GS                        | 50                    | 13   | 0                           | 0   | 0                     | 0   |
| EBV                       | 30                    | 8    | 8                           | 40  | 0                     | 0   |
| MSI                       | 73                    | 9    | 12                          | 60  | 0                     | 0   |
| POLE                      | 7                     | 2    | 0                           | 0   | 0                     | 0   |
| <b>MSIseq Status</b>      | 439                   | 100  | 226                         | 100 | 122                   | 100 |
| MSI – high                | 87                    | 20   | 45                          | 20  | 28                    | 23  |
| nonMSI – high             | 352                   | 80   | 181                         | 80  | 94                    | 77  |
| <b>Immune Subtype</b>     | 388                   | 88   | 0                           | 0   | 0                     | 0   |
| C1                        | 128                   | 33   | 0                           | 0   | 0                     | 0   |
| C2                        | 209                   | 54   | 0                           | 0   | 0                     | 0   |
| C3                        | 35                    | 9    | 0                           | 0   | 0                     | 0   |
| C4                        | 9                     | 2    | 0                           | 0   | 0                     | 0   |
| C6                        | 7                     | 2    | 0                           | 0   | 0                     | 0   |

Table S4: Clinicopathological features of gastric cancer samples according to mutational signature S4 DNA mismatch repair deficiency in the validation cohort

|                                   | <i>All</i> ( <i>n</i> = 170) |     | <i>S4<sup>low</sup></i> ( <i>n</i> = 127) |     | <i>S4<sup>high</sup></i> ( <i>n</i> = 43) |     | <i>Pvalue</i> |
|-----------------------------------|------------------------------|-----|-------------------------------------------|-----|-------------------------------------------|-----|---------------|
|                                   | <i>N</i>                     | %   | <i>N</i>                                  | %   | <i>N</i>                                  | %   |               |
| <b>Age (mean ± SD)</b>            | 61.06 ± 13.33                |     | 60.182 ± 13.24                            |     | 63.65 ± 13.39                             |     | <b>0.0726</b> |
| <b>Gender</b>                     | 170                          | 100 | 127                                       | 100 | 43                                        | 100 |               |
| <i>Female</i>                     | 64                           | 38  | 45                                        | 35  | 19                                        | 44  | 0.3999        |
| <i>Male</i>                       | 106                          | 62  | 82                                        | 65  | 24                                        | 56  |               |
| <b>Race</b>                       | 154                          | 91  | 120                                       | 94  | 34                                        | 79  |               |
| <i>White</i>                      | 91                           | 59  | 72                                        | 60  | 19                                        | 56  | 0.7449        |
| <i>Black</i>                      | 11                           | 7   | 7                                         | 6   | 4                                         | 12  |               |
| <i>Asian</i>                      | 20                           | 13  | 16                                        | 13  | 4                                         | 12  |               |
| <i>Brown</i>                      | 31                           | 20  | 24                                        | 20  | 7                                         | 21  |               |
| <i>Other</i>                      | 1                            | 1   | 1                                         | 1   | 0                                         | 0   |               |
| <b>Anatomic Site</b>              | 170                          | 100 | 127                                       | 100 | 43                                        | 100 |               |
| <i>Cardia/GEJ/Distalesophagus</i> | 57                           | 34  | 47                                        | 37  | 10                                        | 23  | <b>0.0396</b> |
| <i>Anastomosicmouth</i>           | 3                            | 2   | 3                                         | 2   | 0                                         | 0   |               |
| <i>Body</i>                       | 62                           | 36  | 48                                        | 38  | 14                                        | 33  |               |
| <i>Antrum</i>                     | 44                           | 26  | 28                                        | 22  | 16                                        | 37  |               |
| <i>Linitis</i>                    | 4                            | 2   | 1                                         | 1   | 3                                         | 7   |               |
| <b>Histology Lauren</b>           | 152                          | 89  | 111                                       | 87  | 41                                        | 95  |               |
| <i>Diffuse</i>                    | 74                           | 49  | 58                                        | 52  | 16                                        | 39  | 0.2246        |
| <i>Intestinal</i>                 | 59                           | 39  | 39                                        | 35  | 20                                        | 49  |               |
| <i>Mixed</i>                      | 19                           | 13  | 14                                        | 13  | 5                                         | 12  |               |
| <b>Stage T</b>                    | 103                          | 89  | 67                                        | 53  | 36                                        | 84  |               |
| <i>T1 – T2</i>                    | 44                           | 43  | 31                                        | 46  | 13                                        | 36  | 0.5326        |
| <i>T3 – T4</i>                    | 59                           | 57  | 36                                        | 54  | 23                                        | 64  |               |
| <b>Stage N</b>                    | 102                          | 60  | 75                                        | 59  | 37                                        | 86  |               |
| <i>N0</i>                         | 43                           | 42  | 39                                        | 52  | 14                                        | 38  | 0.226         |
| <i>N+</i>                         | 59                           | 57  | 36                                        | 48  | 23                                        | 62  |               |
| <b>Stage M</b>                    | 111                          | 65  | 74                                        | 58  | 37                                        | 86  |               |
| <i>M0</i>                         | 27                           | 24  | 4                                         | 5   | 23                                        | 62  | <0.0001       |
| <i>M1</i>                         | 2                            | 2   | 2                                         | 3   | 0                                         | 0   |               |
| <i>MX</i>                         | 82                           | 74  | 68                                        | 92  | 14                                        | 38  |               |
| <b>Pathological Stage</b>         | 105                          | 62  | 68                                        | 53  | 37                                        | 86  |               |
| <i>I</i>                          | 31                           | 30  | 24                                        | 35  | 7                                         | 19  | 0.2194        |
| <i>II</i>                         | 35                           | 33  | 23                                        | 34  | 12                                        | 32  |               |
| <i>III</i>                        | 31                           | 30  | 17                                        | 25  | 14                                        | 38  |               |
| <i>IV</i>                         | 8                            | 8   | 4                                         | 6   | 4                                         | 11  |               |
| <b>MSIseq Status</b>              | 170                          | 100 | 127                                       | 100 | 43                                        | 100 |               |
| <i>MSI – high</i>                 | 38                           | 22  | 2                                         | 2   | 36                                        | 84  | <0.0001       |
| <i>nonMSI – high</i>              | 132                          | 78  | 125                                       | 98  | 7                                         | 16  |               |
